# Supplementary material for: Full-length Plasmodium falciparum myosin A and essential light chain PfELC structures provide new anti-malarial targets
Source: eLife. 2020 Oct 13;9:e60581. doi: 10.7554/eLife.60581 (PMC7553781; doi:10.7554/eLife.60581)
Supplement: Figure 2—source data 1. [file elife-60581-fig2-data1.xlsx]

## Sheet: panel 2B
LRA		E6R		T586F		S691G
Speed (µm/s)	probability	Speed (µm/s)	probability	Speed (µm/s)	probability	Speed (µm/s)	probability
1.95098	0.000777	3.65178	0.000442	5.97076	0	7.371	0
1.86644	0.001146	3.48016	0.000491	5.70443	0	7.094	0
1.75883	0.003232	3.30853	0.000982	5.43811	0.001	6.817	0.001
1.66604	0.007856	3.13691	0.002798	5.17178	0.006	6.541	0.003
1.57243	0.019966	2.96529	0.005007	4.90545	0.027	6.264	0.011
1.47708	0.051471	2.79366	0.012224	4.63912	0.085	5.987	0.041
1.3845	0.102574	2.62204	0.023711	4.37279	0.174	5.711	0.096
1.29293	0.172456	2.45042	0.049485	4.10646	0.227	5.434	0.159
1.2004	0.202692	2.27879	0.103682	3.84014	0.197	5.157	0.185
1.10768	0.17217	2.10717	0.166176	3.57381	0.121	4.88	0.169
1.01568	0.118326	1.93554	0.192882	3.30748	0.06	4.604	0.121
0.921259	0.064564	1.76392	0.168679	3.04115	0.029	4.327	0.082
0.826166	0.032609	1.5923	0.118459	2.77482	0.017	4.05	0.047
0.729043	0.017798	1.42067	0.066323	2.50849	0.011	3.774	0.029
0.633446	0.011456	1.24905	0.037604	2.24216	0.009	3.497	0.019
0.541756	0.007815	1.07743	0.021797	1.97584	0.008	3.22	0.012
0.444	0.005687	0.905802	0.012469	1.70951	0.007	2.944	0.008
0.34922	0.00401	0.734178	0.007757	1.44318	0.008	2.667	0.007
0.258704	0.002496	0.562554	0.005989	1.17685	0.007	2.39	0.005

## Sheet: panel 2C
the raw data from this panel can be viewed in the supplementary table 2

## Sheet: panel 2D
deltaN			LRA			AAA			K764E			E6R			S19A			WT			T586F			S691G
Speed (µm/s)	ADP release (s-1)	SD	Speed (µm/s)	ADP release (s-1)	SD	Speed (µm/s)	ADP release (s-1)	SD	Speed (µm/s)	ADP release (s-1)	SD	Speed (µm/s)	ADP release (s-1)	SD	Speed (µm/s)	ADP release (s-1)	SD	Speed (µm/s)	ADP release (s-1)	SD	Speed (µm/s)	ADP release (s-1)	SD	Speed (µm/s)	ADP release (s-1)	SD
0.23	10.32	0.919348	1.19	117.367	4.42757	1.24	120.633	1.52753	1.8	103.5	8.56096	1.9	152.85	5.58614	2.1	115.8	10.9055	3.9	334.34	36.1567	4	323.4	53.6137	5.1	580.125	31.3166

## Sheet: panel 2E
E6R		S691G		T586F		LRA
Actin (µM)	Rate (s-1)	Actin (µM)	Rate (s-1)	Actin (µM)	Rate (s-1)	Actin (µM)	Rate (s-1)
2	14.8405	2	9.00254	3	8.95063	4	15.5684
5	34.0606	5	19.0889	7	18.2355	8	23.2273
9	41.5898	9	27.8137	11	26.3292	12	28.2205
13	47.7584	13	35.9544	15	26.2462	20	32.8367
18	50.9787	18	40.2851	20	32.7325	35	36.4695
24	54.562	24	44.0189	28	35.157	55	41.2368
32	57.5782	32	48.2353	36	36.7179	90	43.9024
52	60.2316	52	55.0425	46	39.4081
64	62.5448	64	60.1225	58	41.6665	2	8.41422
84	61.7284	82	64.5929	75	45.1206	6	17.7523
100	58.886	100	65.2279	90	46.3162	10	23.8504
						16	27.9158
3	23.3222	3	9.87206	2	4.7666	28	33.1445
7	35.8586	7	20.855	5	10.3861	45	38.6191
11	49.9093	11	26.9637	9	16.1981	73	41.1783
15	52.8904	15	34.2027	13	24.6316
20	53.3456	20	38.3683	18	28.0358
28	54.0445	28	44.477	24	30.8242
36	53.4329	42	51.9057	32	34.1771
44	56.109	58	54.9537	41	36.897
58	54.7725	73	57.3392	52	38.0261
75	54.7142	95	59.984	66	39.3604
90	57.3657			82	41.3619
105	52.5593	4	14.7681	100	40.9342
		8	20.805
2.5	22.7321	12	32.8374
4	29.2199	17	37.4271
8	40.8002	22	40.6533
10	44.358	30	46.1397
14	51.2782	38	47.9129
19	54.7105	45	48.472
22	53.957	55	54.5404
30	55.8266	69	52.8648
40	57.3893	79	56.8156
48	56.887	105	59.3076
55	57.3893
69	57.5567
80	55.7987
95	54.9058

## Sheet: panel 2F
E6R			T586F			S691G
Utrophin (nM)	% time mobile	SD	Utrophin (nM)	% time mobile	SD	Utrophin (nM)	% time mobile	SD
0	66.5	0.433	0	78.5	0.53	0	67.1	0.164
0.8	53.6	1.57	1.25	54.6	3.42	1.5	50.1	2.19
1.5	51.5	1.26	2.5	44.1	1.16	3	26.7	0.741
3	46.4	1.84	5	33.9	2.53	6	20.5	1.87
6.5	33.3	2.13	7.5	17.2	1.49	10	9.69	0.102
9	27	1.89	10	14.1	1.46
12	15.1	2.41	14	10.1	1.12	0	80.8	0.228
22.5	12.9	1.4	18	7.52	1.2	1	67.7	0.23
			30	7.89	1.34	2.25	38.4	5.37
0	63.7	0.211				5	21.9	4.11
1.2	44.2	1.81	0	76	1.09	8	21.4	2.67
2.25	43.9	1.91	1	61.9	3.11	10.5	12.5	0.649
5	41.8	1.54	1.75	43.8	1.88	14	9.86	1.17
7.5	32	1.68	3.25	29.1	3.54	25	9.64	0.925
10.5	21.9	0.836	5.5	20.4	1.66
15	12.9	1.43	8	18.9	1.56	0	80.4	0.291
19	11.9	1.89	11	13.4	0.592	0.8	58.3	1.98
28	8.97	0.765	17	10.8	1.5	1.5	53.6	3.08
			22	11.9	1.32	3	52	2.03
0	68.8	0.29	28	9.25	1.49	4.5	27.5	4.14
2	52.8	1.09				6.5	19.4	4.27
4	44.3	1.91	0	73.6	1.67	9	17.2	1.92
5.75	33.6	2.48	0.6	72.5	1.05	12	7.55	0.727
9.75	26.7	1.53	1.5	67.2	0.166	16	10.7	1.74
13.5	27.9	2.07	3	48.3	0.668	22.5	8.23	0.776
17	11.7	1.28	4.5	29.1	1.92
25	16.9	1.58	7	27.7	1.07
32	15.3	1.29	9.25	20.2	0.613
40	13.2	1.4	13	18.1	0.553
			20	11.7	0.718
			26.5	11.4	0.417
