# Supplementary material for: Full-length Plasmodium falciparum myosin A and essential light chain PfELC structures provide new anti-malarial targets
Source: eLife. 2020 Oct 13;9:e60581. doi: 10.7554/eLife.60581 (PMC7553781; doi:10.7554/eLife.60581)
Supplement: Figure 6—figure supplement 1—source data 1. [file elife-60581-fig6-figsupp1-data1.xlsx]

## Sheet: Figure 6-Supplement 1a
LRA		E6R		T586F		S691G
Speed (µm/s)	probability	Speed (µm/s)	probability	Speed (µm/s)	probability	Speed (µm/s)	probability
1.95098	0.000777	3.65178	0.000442	5.97076	0	7.371	0
1.86644	0.001146	3.48016	0.000491	5.70443	0	7.094	0
1.75883	0.003232	3.30853	0.000982	5.43811	0.001	6.817	0.001
1.66604	0.007856	3.13691	0.002798	5.17178	0.006	6.541	0.003
1.57243	0.019966	2.96529	0.005007	4.90545	0.027	6.264	0.011
1.47708	0.051471	2.79366	0.012224	4.63912	0.085	5.987	0.041
1.3845	0.102574	2.62204	0.023711	4.37279	0.174	5.711	0.096
1.29293	0.172456	2.45042	0.049485	4.10646	0.227	5.434	0.159
1.2004	0.202692	2.27879	0.103682	3.84014	0.197	5.157	0.185
1.10768	0.17217	2.10717	0.166176	3.57381	0.121	4.88	0.169
1.01568	0.118326	1.93554	0.192882	3.30748	0.06	4.604	0.121
0.921259	0.064564	1.76392	0.168679	3.04115	0.029	4.327	0.082
0.826166	0.032609	1.5923	0.118459	2.77482	0.017	4.05	0.047
0.729043	0.017798	1.42067	0.066323	2.50849	0.011	3.774	0.029
0.633446	0.011456	1.24905	0.037604	2.24216	0.009	3.497	0.019
0.541756	0.007815	1.07743	0.021797	1.97584	0.008	3.22	0.012
0.444	0.005687	0.905802	0.012469	1.70951	0.007	2.944	0.008
0.34922	0.00401	0.734178	0.007757	1.44318	0.008	2.667	0.007
0.258704	0.002496	0.562554	0.005989	1.17685	0.007	2.39	0.005

## Sheet: Figure 6-Supplement 1b
the raw data from this panel can be viewed in the supplementary table 2

## Sheet: Figure 6-Supplement 1c
LRA		AAA
Actin (µM)	Rate (s-1)	Actin (µM)	Rate (s-1)
4	15.5684	4	10.8869
8	23.2273	8	17.3417
12	28.2205	12	21.5418
20	32.8367	20	26.691
35	36.4695	35	32.9456
55	41.2368	55	36.4695
90	43.9024	90	37.3927
2	8.41422	2	6.23902
6	17.7523	6	12.6457
10	23.8504	10	19.5397
16	27.9158	16	22.4173
28	33.1445	28	30.0445
45	38.6191	45	33.5011
73	41.1783	73	34.8022

## Sheet: Figure 6-Supplement 1d
E6R			T586F			S691G
Utrophin (nM)	% time mobile	SD	Utrophin (nM)	% time mobile	SD	Utrophin (nM)	% time mobile	SD
0	66.5	0.433	0	78.5	0.53	0	67.1	0.164
0.8	53.6	1.57	1.25	54.6	3.42	1.5	50.1	2.19
1.5	51.5	1.26	2.5	44.1	1.16	3	26.7	0.741
3	46.4	1.84	5	33.9	2.53	6	20.5	1.87
6.5	33.3	2.13	7.5	17.2	1.49	10	9.69	0.102
9	27	1.89	10	14.1	1.46
12	15.1	2.41	14	10.1	1.12	0	80.8	0.228
22.5	12.9	1.4	18	7.52	1.2	1	67.7	0.23
			30	7.89	1.34	2.25	38.4	5.37
0	63.7	0.211				5	21.9	4.11
1.2	44.2	1.81	0	76	1.09	8	21.4	2.67
2.25	43.9	1.91	1	61.9	3.11	10.5	12.5	0.649
5	41.8	1.54	1.75	43.8	1.88	14	9.86	1.17
7.5	32	1.68	3.25	29.1	3.54	25	9.64	0.925
10.5	21.9	0.836	5.5	20.4	1.66
15	12.9	1.43	8	18.9	1.56	0	80.4	0.291
19	11.9	1.89	11	13.4	0.592	0.8	58.3	1.98
28	8.97	0.765	17	10.8	1.5	1.5	53.6	3.08
			22	11.9	1.32	3	52	2.03
0	68.8	0.29	28	9.25	1.49	4.5	27.5	4.14
2	52.8	1.09				6.5	19.4	4.27
4	44.3	1.91	0	73.6	1.67	9	17.2	1.92
5.75	33.6	2.48	0.6	72.5	1.05	12	7.55	0.727
9.75	26.7	1.53	1.5	67.2	0.166	16	10.7	1.74
13.5	27.9	2.07	3	48.3	0.668	22.5	8.23	0.776
17	11.7	1.28	4.5	29.1	1.92
25	16.9	1.58	7	27.7	1.07
32	15.3	1.29	9.25	20.2	0.613
40	13.2	1.4	13	18.1	0.553
			20	11.7	0.718
			26.5	11.4	0.417

## Sheet: Figure 6-Supplement 1e
minus PfELC
Utrophin (nM)	% time mobile	SD
0	67.5	2.55
1.25	43.4	2.04
2	33.3	3.14
3	20.8	0.995
4.25	20.2	1.43
6.25	17.4	2.42
8.75	15.3	1.2
12.5	14	1.16
17.5	20.5	4.99
25	9.64	0.503
0	69.4	1.33
0.8	58.1	4.7
1.5	40.1	1.62
2.5	32.5	2.85
5	19.4	1.77
7.5	14.5	1.26
11	12.4	1.26
15	19.4	0.854
20	13.4	1.92
