# Supplementary material for: Full-length Plasmodium falciparum myosin A and essential light chain PfELC structures provide new anti-malarial targets
Source: eLife. 2020 Oct 13;9:e60581. doi: 10.7554/eLife.60581 (PMC7553781; doi:10.7554/eLife.60581)
Supplement: Figure 7—source data 1. [file elife-60581-fig7-data1.xlsx]

## Sheet: Figure_7
Source Data for Moussaoui et al, 2020
Figure 7a		B11		PfELC-3xHA
	Time (h)	Exp1	Exp2	Exp1	Exp2
	0	0.1	0.1	0.1	0.11
	48	0.59	0.58	0.6	0.47
	96	3.98	2.41	3.27	2.17
	144	9	4.28	7.16	5.29
Figure 7e		B11		PfELC-3xHA
		DMSO	heparin	DMSO	RAP
	Exp1	100	6.4	100	19
	Exp2	100	5.3	100	14
	Exp3	100	3.45	100	13
Figure 7f		B11		PfELC-3xHA
		DMSO	RAP	DMSO	RAP
	Exp1	100	81.35	100	6.38
	Exp2	100	87.74	100	8.33
	Exp3	100	94.27	100	13.64
	Exp4	-	-	100	13.89
	Exp5	-	-	100	14.11
Figure 7g		B11		PfELC-3xHA
		DMSO	RAP	DMSO	RAP
	Exp1	100	112	100	1.38
	Exp2	100	72.61	100	0.61
	Exp3	100	103	100	0.42
